# Supplementary material for: Colloidal Lignin Particles and Epoxies for Bio-Based, Durable, and Multiresistant Nanostructured Coatings
Source: PubMed Central journal article supplement (PMC8397241; doi:10.1021/acsami.1c06087), 2021-07-15
Supplement: am1c06087_si_001.pdf [file am1c06087_si_001.pdf]

## Supporting Information

### Colloidal Lignin Particles and Epoxies for Bio-based, Durable, and Multiresistant Nanostructured Coatings

Karl Alexander Henn<sup>a</sup>, Nina Forsman<sup>a</sup>, Zou Tao<sup>a</sup>, Monika Österberg<sup>a\*</sup>

<sup>a</sup> Aalto University, School of Chemical Engineering, Department of Bioproducts and Biosystems, Vuorimiehentie 1, 02150 Espoo, Finland (firstname.surname@aalto.fi)

\* Correspondance to Monika Österberg ([monika.osterberg@aalto.fi](mailto:monika.osterberg@aalto.fi), Vuorimihentie 1, 02150, Espoo, Finland)

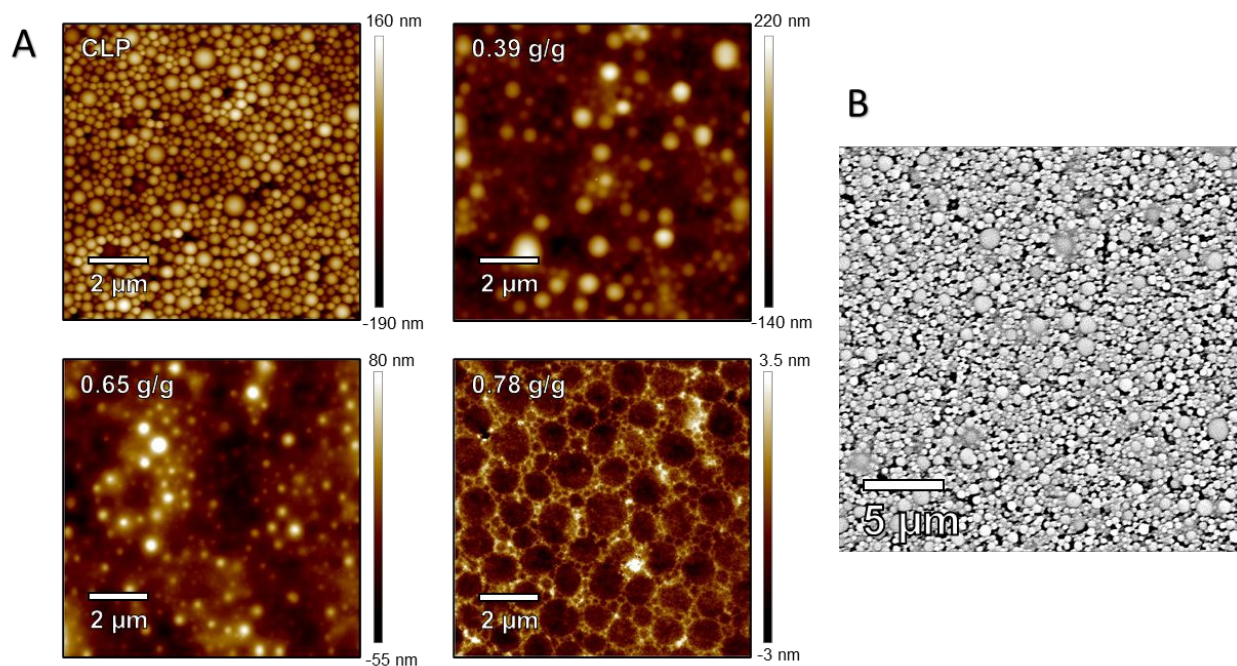

Figure S1. Microscopy images of coatings with different GDE/CLP ratios. (A) AFM images of CLPs and GDE/CLP mixtures of different ratios (0.39, 0.65, 0.78 g/g). (B) An SEM image of GDE/CLP mixture with the ratio of 0.65 g/g. All samples were cured for one hour at 105°C.

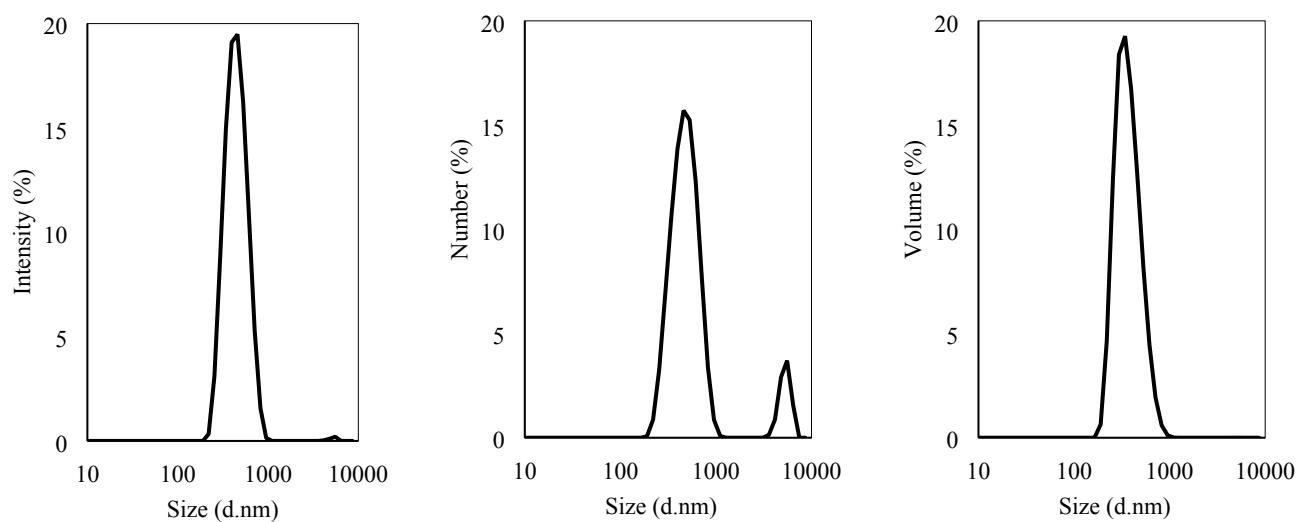

Figure S2. Dynamic light scattering particle size distributions of CLPs.

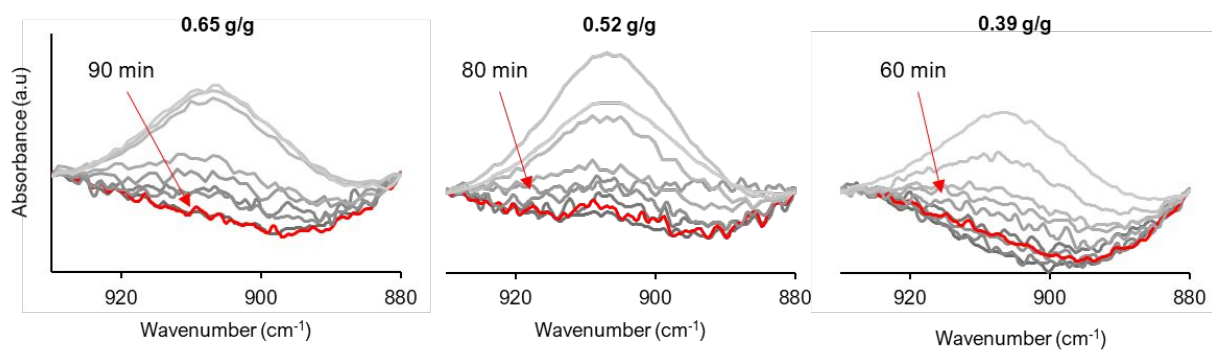

Figure S3. Normalized FTIR absorbance intensities between wavenumbers 880 – 930  $\text{cm}^{-1}$  of coatings with different GDE/CLP ratios at different curing times (10 – 100 minutes, from light to dark hue). The red line signifies the first signal whose intensity is below 8% of its original intensity, signifying a near completed curing.

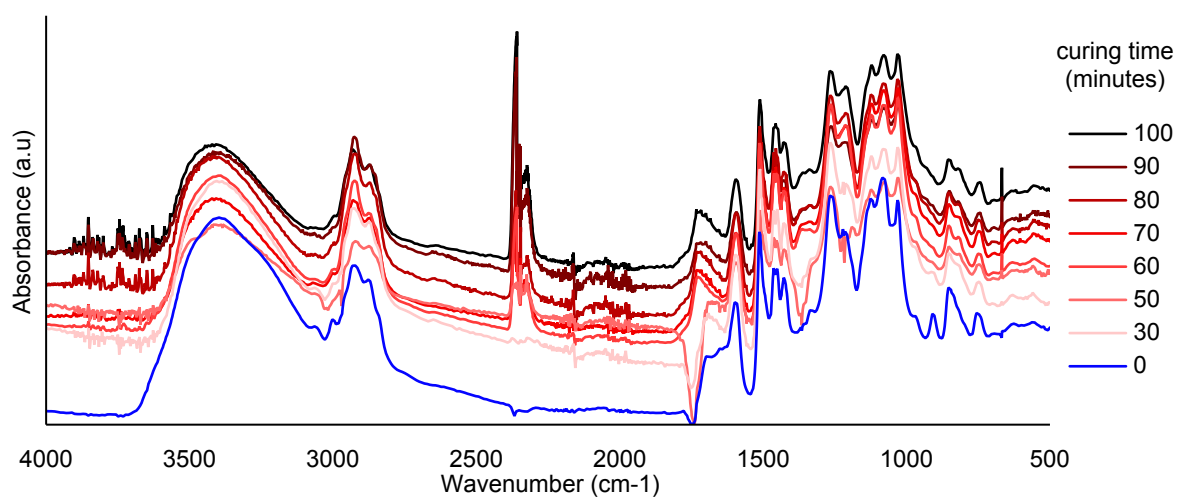

Figure S4. FTIR spectra of coating with the GDE/CLP 0.52 g/g cured for different durations at 105°C.

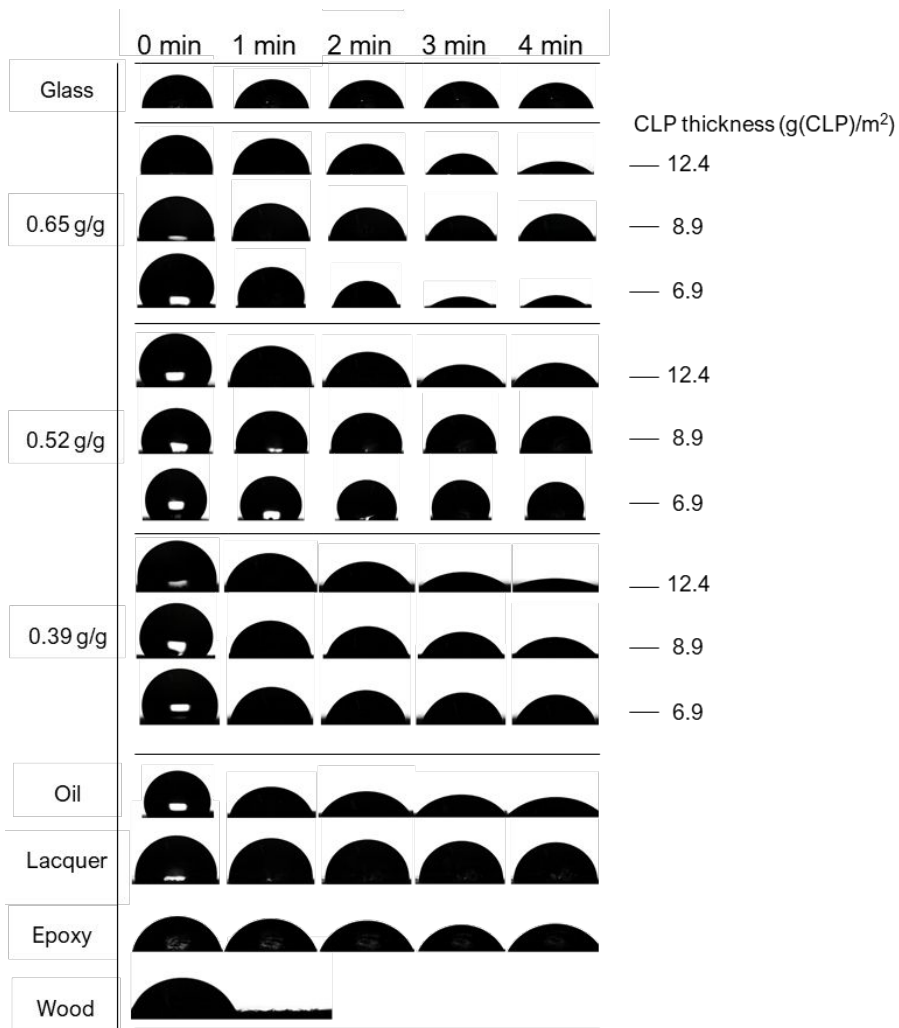

Figure S5. Change in volume of water due to absorption through GDE/CLP coatings of different thicknesses (12.4, 8.9, 6.9 g(CLP)/m<sup>2</sup>, thickest to thinnest) and through wood oil, commercial epoxy, wood lacquer, and uncoated wood.

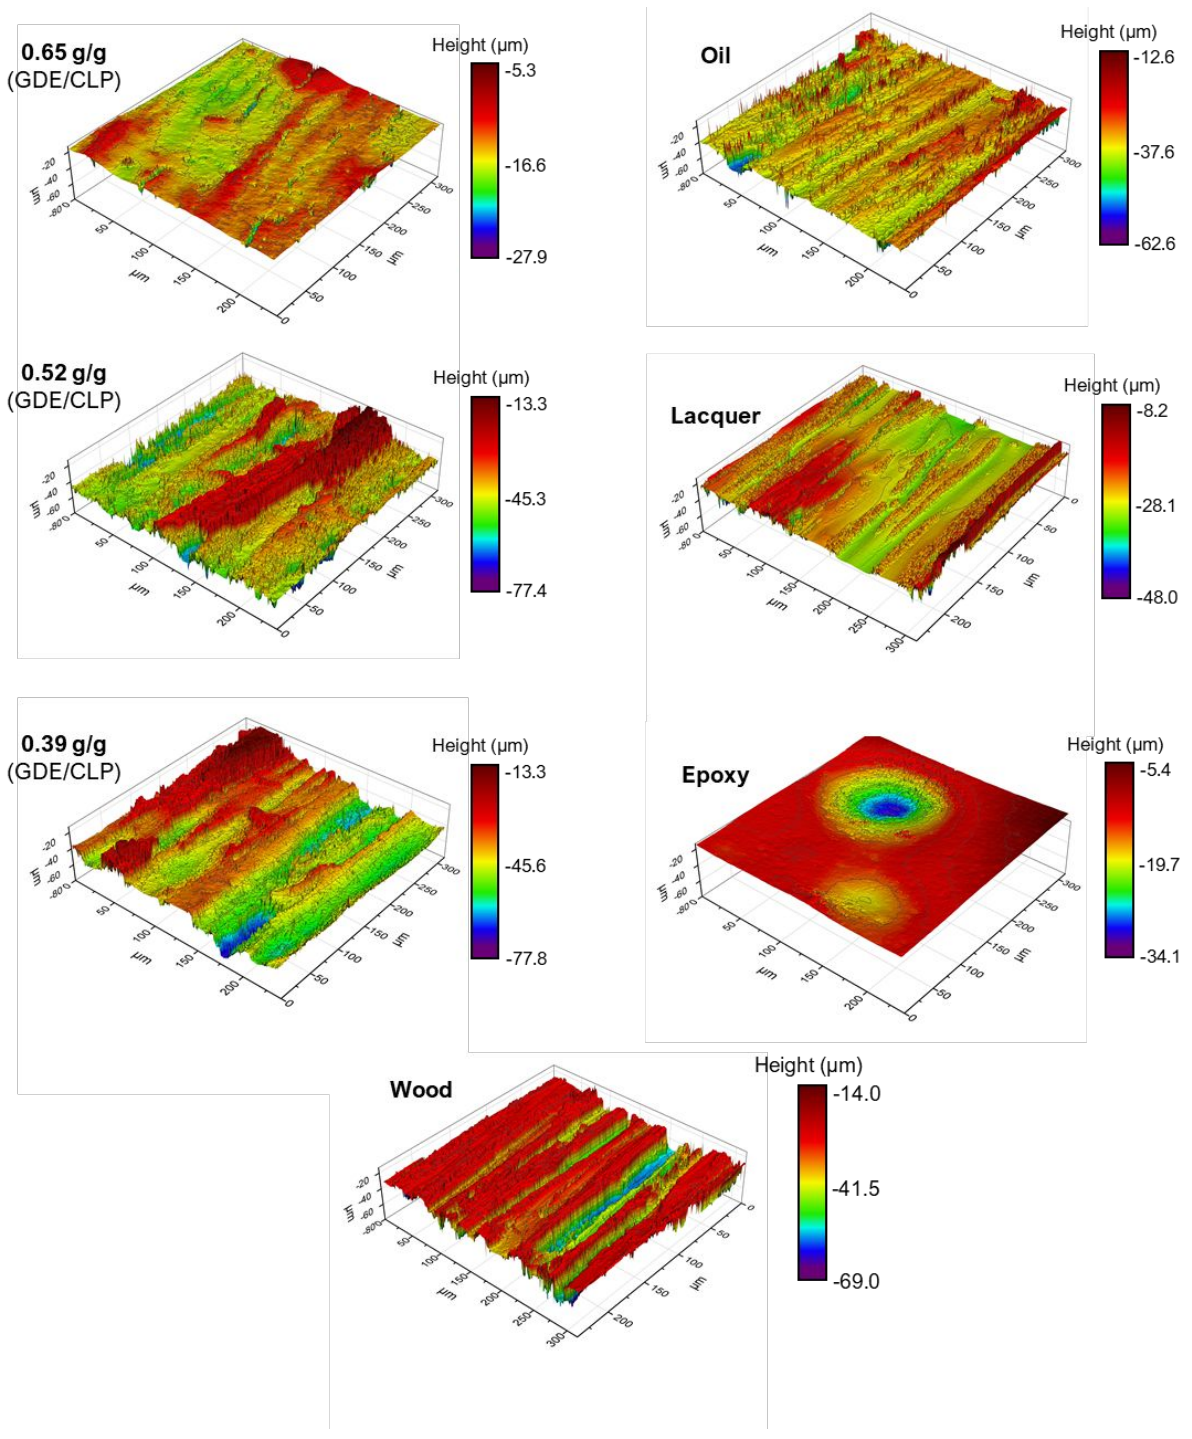

Figure S6. Light-interferometry images of wood coated with GDE/CLP coatings with thicknesses 12.4 g(CLP)/m<sup>2</sup> and different GDE/CLP ratios and reference coatings.

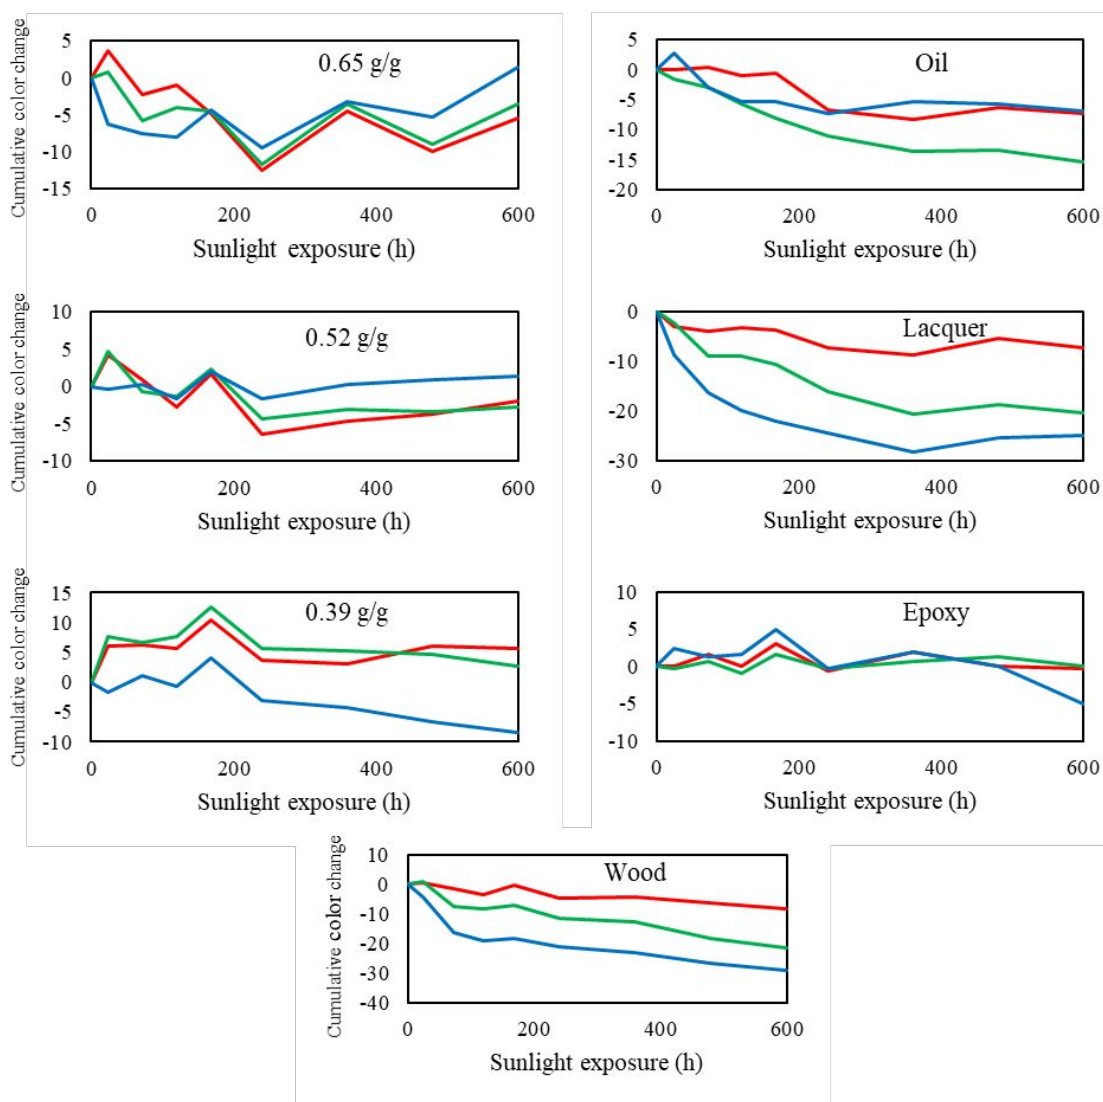

Figure S7. Isolated color change of GDE/CLP coatings with the thickness 12.4 g(CLP)/m<sup>2</sup>, reference coatings, and uncoated wood by exposure to simulated sunlight.

Table S1. <sup>31</sup>P-NMR characterization results of UPM Biopiva 100 kraft lignin for the determination of hydroxyl content.

| Sample no. | Aliphatic OH<br>(mmol/g) | Phenolic OH<br>(mmol/g) | Carboxylic OH<br>(mmol/g) | Total OH<br>(mmol/g) |
|------------|--------------------------|-------------------------|---------------------------|----------------------|
| 1          | 1.95                     | 3.85                    | 0.45                      | 6.25                 |
| 2          | 2.17                     | 3.87                    | 0.48                      | 6.52                 |
